# Supplementary material for: Fourier-transform infrared spectroscopy for characterization of protein chain reductions in enzymatic reactions
Source: Royal Society of Chemistry journal article supplement (doi:10.1039/c7an00488e), 2017-01-01

Supplementary information for

**Fourier-transform infrared spectroscopy for characterization of  
protein chain reductions in enzymatic reactions**

Ulrike Böcker<sup>a\*</sup>, Sileshi Gizachew Wubshet<sup>a</sup>, Diana Lindberg<sup>a</sup>, and Nils Kristian Afseth<sup>a</sup>

<sup>a</sup>Nofima – Norwegian Institute of Food, Fisheries and Aquaculture Research, P.O. Box 210,  
Osloveien 1, 1431 Ås, Norway.

\* Corresponding author: Ulrike Böcker

*E-mail address:* [ulrike.bocker@nofima.no](mailto:ulrike.bocker@nofima.no) (Ulrike Böcker).

Figure S1: Score (A: salmon muscle(SF) and C: chicken muscle(CF)) and loading(B: salmon muscle(SF) and D: chicken muscle(CF)) plot from FTIR-based PCA of protein hydrolysates collected during Alcalase catalyzed protein hydrolysis. The PCA was based on an FTIR spectral region from 1800-700  $\text{cm}^{-1}$ .

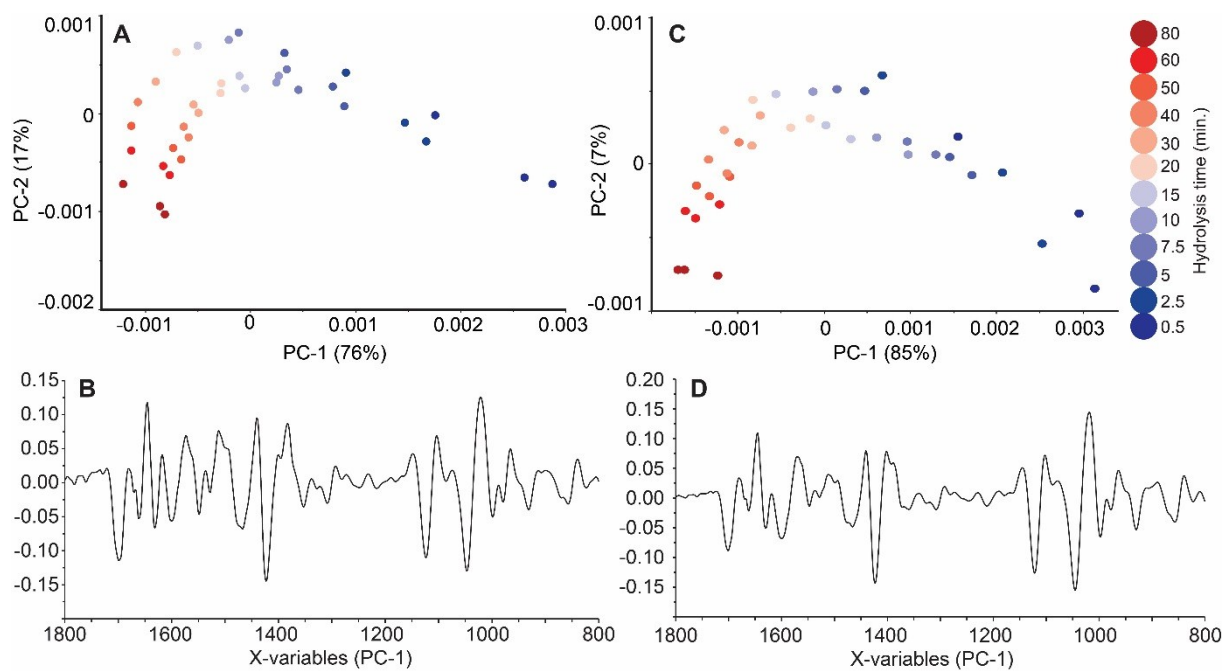

Figure S2: Score (A: salmon processing by-products(SPB) and C: mechanical chicken deboning residues (MCDR)) and loading(B: salmon processing by-products(SPB) and D: mechanical chicken deboning residues (MCDR)) plot from FTIR-based PCA of protein hydrolysates collected during Alcalase catalyzed protein hydrolysis. The PCA was based on an FTIR spectral region from 1800-700  $\text{cm}^{-1}$ .

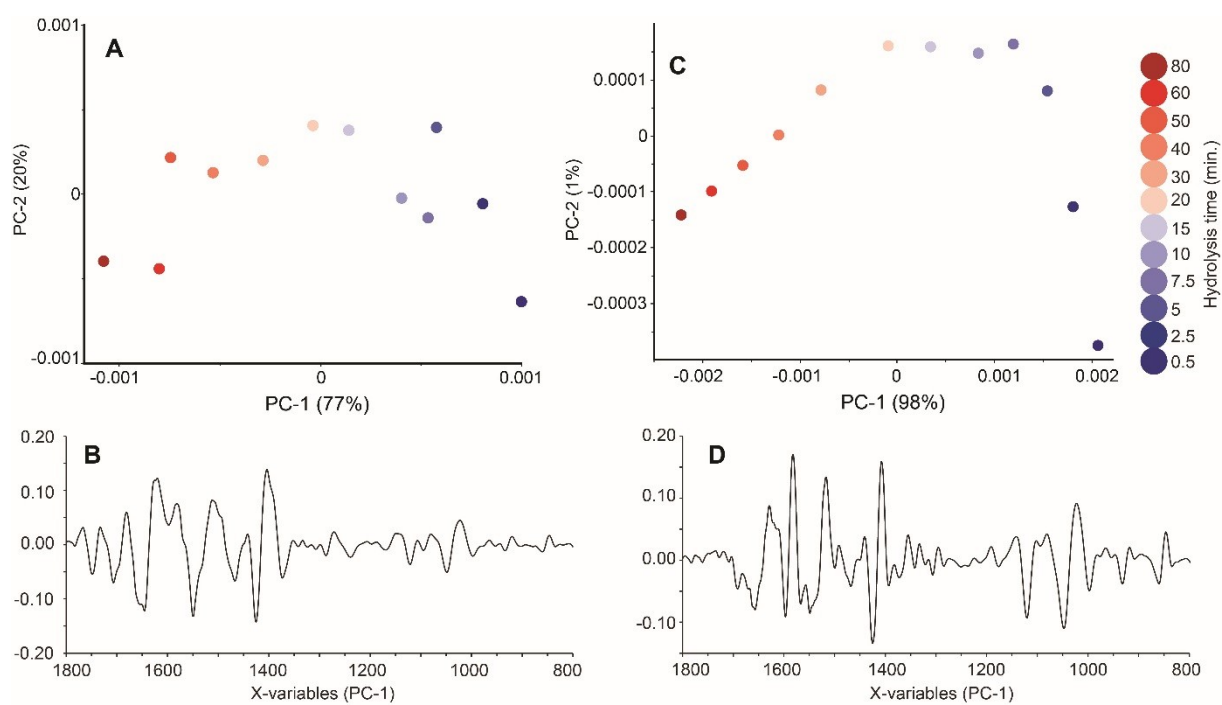

Figure S3: Exemplary EMSC-corrected absorbance spectra of hydrolysate of MCDR from 4 hydrolysis time points (0.5, 10, 40, and 80 min). Region a and b highlight bands that display ratio change with increasing hydrolysis time.

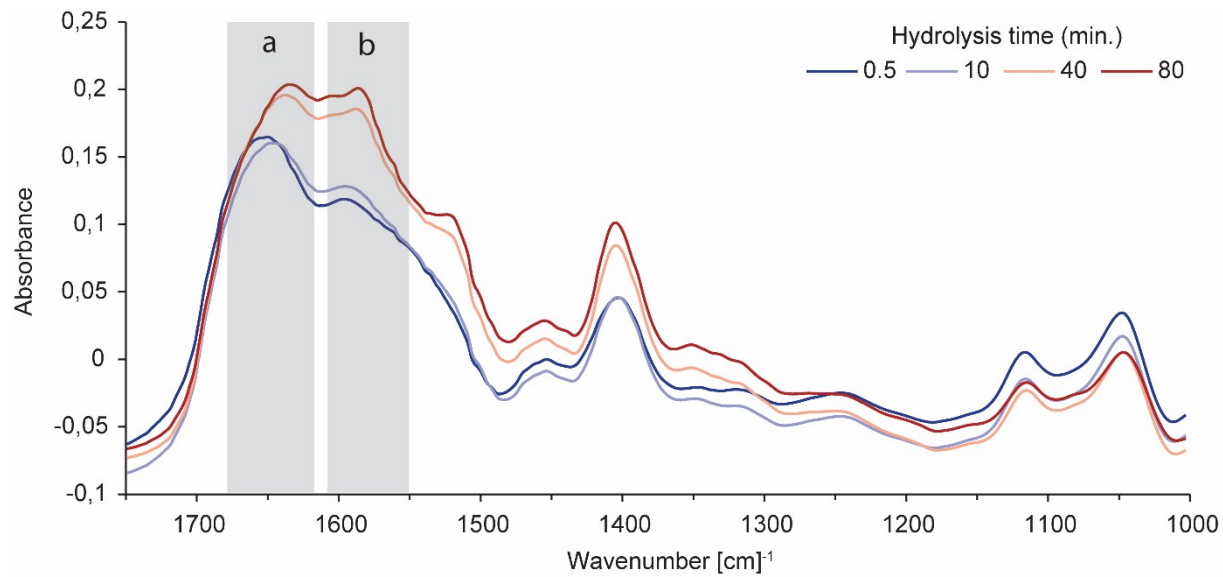

Supplement: c7an00488e1.pdf [file c7an00488e1.pdf]
